# Supplementary material for: Crystallographic Studies Evidencing the High Energy Tolerance to Disrupting the Interface Disulfide Bond of Thioredoxin 1 from White Leg Shrimp Litopenaeus vannamei
Source: MDPI journal article supplement (doi:10.3390/molecules191221113), 2014-12-15

## Supplementary Materials

**Table S1.** Specific radiation damage to the disulfide bridges of different proteins as well as the area of solvent exposure for each cysteine. The absorbed dose is given in MGy. In red color is underlined those disulfide bonds that were reduced by radiation damage experiments.

| Disulfide Bond    | Residue | Solvent Accessibility<br>(Å <sup>2</sup> ) | Absorbed Dose in MGy                                                                                               |
|-------------------|---------|--------------------------------------------|--------------------------------------------------------------------------------------------------------------------|
| Lisozyme          |         |                                            |                                                                                                                    |
| Cys6-Cys127       | Cys6    | 43                                         | 1 MGy<br>PDB 4h8x, 4h8y, 4h8z,4h90, 4h91, 4h92,<br>4h93, 4h94, 4h9a, 4h9b, 4h9c, 4h9e, 4h9f,<br>4h9h, 4h9i         |
|                   | Cys127  | 21                                         |                                                                                                                    |
| Cys30-Cys115      | Cys30   | 0                                          |                                                                                                                    |
|                   | Cys115  | 0                                          |                                                                                                                    |
| Cys64-Cys80       | Cys64   | 0                                          |                                                                                                                    |
|                   | Cys80   | 1                                          |                                                                                                                    |
| Cys76-Cys94       | Cys76   | 20                                         |                                                                                                                    |
|                   | Cys94   | 2                                          |                                                                                                                    |
| TcAChE            |         |                                            |                                                                                                                    |
| Cys67-Cys94       | Cys67   | 11.2                                       | 6 MGy<br>PDB 1qid, 1qie, 1qif, 1qig, 1qih, 1qii, 1qij,<br>1qik, 1qim                                               |
|                   | Cys94   | 3.5                                        |                                                                                                                    |
| Cys254-Cys265     | Cys254  | 18.8                                       |                                                                                                                    |
|                   | Cys265  | 20.4                                       |                                                                                                                    |
| Cys402-Cys521     | Cys402  | 2.1                                        |                                                                                                                    |
|                   | Cys521  | 11.9                                       |                                                                                                                    |
| Elastase          |         |                                            |                                                                                                                    |
| Cys58-Cys42       | Cys58   | 4.2                                        | 13 MGy<br>PDB 3mnb, 3mnc, 3mns, 3mnx, 3mo3,<br>3mo6, 3mo9, 3moc, 3mty, 3odf, 3mu0,<br>3mu1, 3mu4, 3odd, 3mu5, 3mu8 |
|                   | Cys42   | 1.3                                        |                                                                                                                    |
| Cys182-Cys168     | Cys182  | 3.2                                        |                                                                                                                    |
|                   | Cys168  | 0                                          |                                                                                                                    |
| Cys220-Cys191     | Cys220  | 1.8                                        |                                                                                                                    |
|                   | Cys191  | 5.4                                        |                                                                                                                    |
| Cys136-Cys201     | Cys136  | 0.1                                        |                                                                                                                    |
|                   | Cys201  | 0                                          |                                                                                                                    |
| Trypsin           |         |                                            |                                                                                                                    |
| Cys157-Cys22      | Cys157  | 2.3                                        | 7 MGy<br>PDB 1hj8, 1hj9                                                                                            |
|                   | Cys22   | 21.5                                       |                                                                                                                    |
| Cys58-Cys42       | Cys58   | 3.1                                        |                                                                                                                    |
|                   | Cys42   | 4.0                                        |                                                                                                                    |
| Cys232-Cys128     | Cys232  | 24.7                                       |                                                                                                                    |
|                   | Cys128  | 68.6                                       |                                                                                                                    |
| Cys201-Cys136     | Cys201  | 2.2                                        |                                                                                                                    |
|                   | Cys136  | 1.2                                        |                                                                                                                    |
| Cys168-Cys182     | Cys168  | 0                                          |                                                                                                                    |
|                   | Cys182  | 0                                          |                                                                                                                    |
| Cys191-Cys220     | Cys191  | 2.4                                        |                                                                                                                    |
|                   | Cys220  | 11.4                                       |                                                                                                                    |
| Thioredoxin LvTrx |         |                                            |                                                                                                                    |
| Cys73-Cys73'      | Cys73   | 23.3                                       | 0.67 MGy<br>PDB 4aj7, 4aj8, 3zzx, 4aj6                                                                             |
|                   | Cys73'  | 36.5                                       |                                                                                                                    |
| ACys32-ACys35     | ACys32  | 0                                          |                                                                                                                    |
|                   | ACys35  | 0.2                                        |                                                                                                                    |
| BCys32-BCys35     | BCys32  | 0                                          |                                                                                                                    |
|                   | BCys35  | 4.2                                        |                                                                                                                    |

**Table S2.** Comparison of solvent accessibility by the catalytic disulfide and Trx interface in different species depending on the arrangement in the crystal lattice (dimer and monomer).

| Disulfide Bond                      | Residue | Solvent Accessibility (Å²) | Absorbed Dose in MGy    |
|-------------------------------------|---------|----------------------------|-------------------------|
| Thioredoxin LvTrx Dimer             |         |                            |                         |
| Cys73-Cys73'                        | Cys73   | 23.3                       | 0.013 MGy               |
|                                     | Cys73'  | 36.5                       |                         |
| ACys32-ACys35                       | ACys32  | 0                          | PDB 3zzx                |
|                                     | ACys35  | 0.2                        | Catalytic site          |
| BCys32-BCys35                       | BCys32  | 0                          | Partially reduced       |
|                                     | BCys35  | 4.2                        |                         |
| Thioredoxin LvTrx Dimer             |         |                            |                         |
| Cys73-Cys73'                        | Cys73   | 27.5                       | 0.51 MGy                |
|                                     | Cys73'  | 32.1                       |                         |
| ACys32-ACys35                       | ACys32  | 0                          | PDB 4aj6                |
|                                     | ACys35  | 5.4                        | Catalytic site reduced  |
| BCys32-BCys35                       | BCys32  | 0                          |                         |
|                                     | BCys35  | 4.7                        |                         |
| Thioredoxin LvTrx Dimer             |         |                            |                         |
| Cys73-Cys73'                        | Cys73   | 20.7                       | 0.67 MGy                |
|                                     | Cys73'  | 38.8                       |                         |
| ACys32-ACys35                       | ACys32  | 0                          | PDB 4aj7                |
|                                     | ACys35  | 4.4                        | Catalytic site oxidized |
| BCys32-BCys35                       | BCys32  | 0                          |                         |
|                                     | BCys35  | 3.7                        |                         |
| Thioredoxin LvTrx Dimer             |         |                            |                         |
| Cys73-Cys73'                        | Cys73   | 27.7                       | 0.019 MGy               |
|                                     | Cys73'  | 28.3                       |                         |
| ACys32-ACys35                       | ACys32  | 0                          | PDB 4aj8                |
|                                     | ACys35  | 0                          | Catalytic site          |
| BCys32-BCys35                       | BCys32  | 0                          | Partially reduced       |
|                                     | BCys35  | 0                          |                         |
| Human Thioredoxin Monomer           |         |                            |                         |
| Cys73                               | Cys73   | 62.2                       | Unkown                  |
| ACys32-ACys35                       | ACys32  | 14.5                       | 1ert                    |
|                                     | ACys35  | 6.9                        | Catalytic site reduced  |
| Human Thioredoxin Monomer           |         |                            |                         |
| Cys73                               | Cys73   | 65.6                       | Unkown                  |
| ACys32-ACys35                       | ACys32  | 6.3                        | 1eru                    |
|                                     | ACys35  | 1.9                        | Catalytic site Oxidized |
| E. coli Thioredoxin Monomer         |         |                            |                         |
| ACys32-ACys35                       | ACys32  | 5.2                        | Unkown                  |
|                                     | ACys35  | 3.3                        | 2trx                    |
| Catalytic site Oxidized             |         |                            |                         |
| D. melanogaster Thioredoxin Monomer |         |                            |                         |
| ACys32-ACys35                       | ACys32  | 6.9                        | Unkown                  |
|                                     | ACys35  | 2.8                        | 1xw9                    |
| Catalytic site Oxidized             |         |                            |                         |

**Figure S1.** Sequential deterioration of the catalytic and the interface disulfide bond at continue X-ray exposure. In the top panel are shown the first images of videos to correspond to crystal *LvTrx-1x* and *LvTrx-3x*. The videos can be visualized in an external file. In the below panel, the summary of the catalytic and interface disulfide bonds changes are shown during exposure to X-ray. Colors from white to deep red illustrate the dose received during the data collection. The black arrows indicate the dose in which these disulfide bonds are broken.

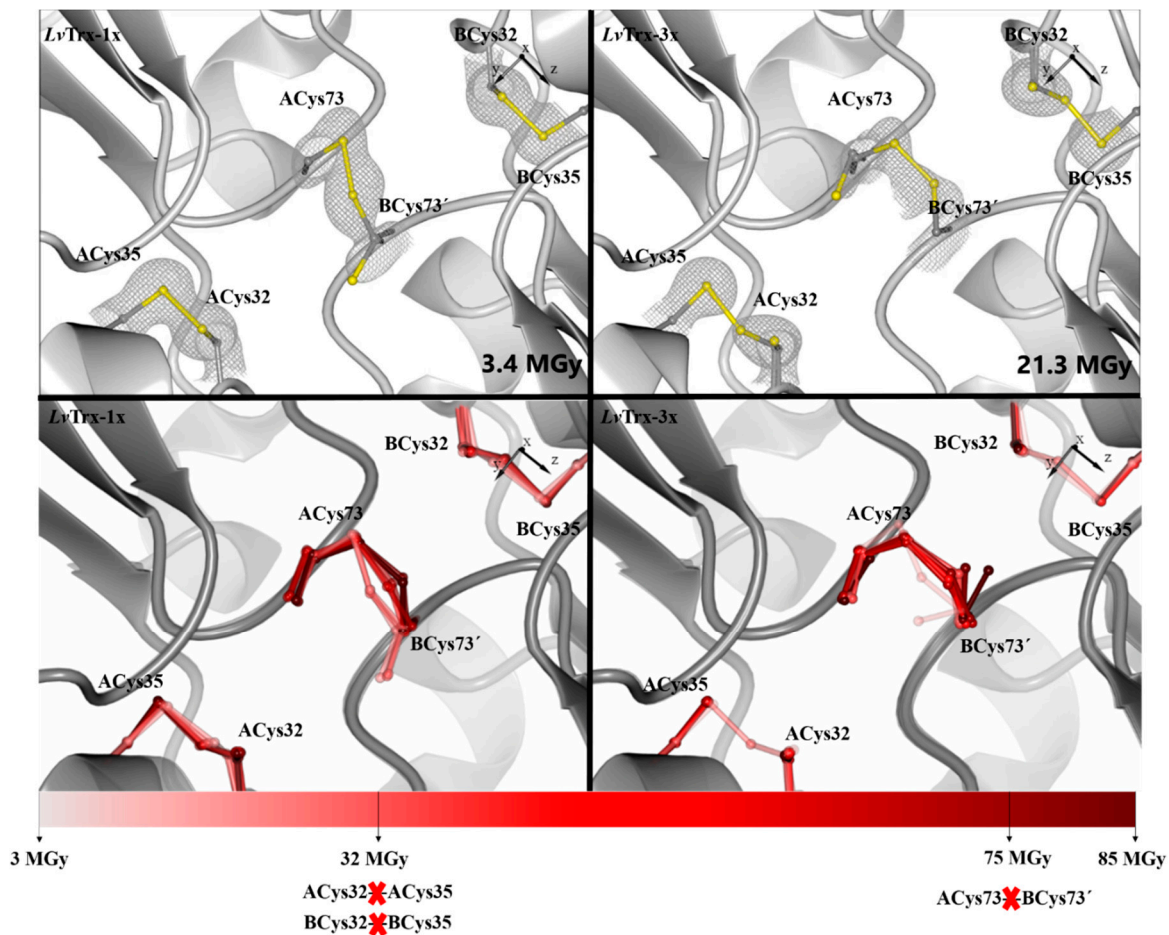

Supplement: s1 [file s1]
